# Supplementary material for: Novel Methodology for the Design of Personalized Cancer Vaccine Targeting Neoantigens: Application to Pancreatic Ductal Adenocarcinoma.
Source: Preprints.org preprint supplement (doi:10.20944/preprints202405.1612.v1), 2024-05-24
Supplement: Supplementary file 1 [file supplementary]

## Sheet: Sheet1
Mutation	Allele	Peptide	Binding Affinity	Rank	Immunogenicity	Antigenicity	Binding Strength
GNAS_R201C	HLA-A0201	AMSNLVPPV	4.6	0.025	0.28316	0.5679	strong binding
SMAD4_Y353C	HLA-B5801	QSIKETPCW	6.5	0.03	0.0993	1.6421	strong binding
SMAD4_H290R	HLA-B5801	QSIKETPCW	6.5	0.03	0.0993	1.6421	strong binding
SMAD4_G386R	HLA-B5801	QSIKETPCW	6.5	0.03	0.0993	1.6421	strong binding
TP53_R248Q	HLA-A0301	CTYSPALNK	6.7	0.01	0.14922	0.5679	strong binding
KRAS_G12D	HLA-B5801	KSFEDIHHY	7.4	0.04	0.10207	1.6421	strong binding
KRAS_G12S	HLA-B5801	KSFEDIHHY	7.4	0.04	0.10207	1.6421	strong binding
KRAS_Q61H	HLA-B5801	KSFEDIHHY	7.4	0.04	0.10207	1.6421	strong binding
SMAD4_Y353C	HLA-B3901	MPIADPQPL	7.9	0.015	0.0993	1.6421	strong binding
SMAD4_H290R	HLA-B3901	MPIADPQPL	7.9	0.015	0.0993	1.6421	strong binding
SMAD4_G386R	HLA-B3901	MPIADPQPL	7.9	0.015	0.0993	1.6421	strong binding
SMAD4_Y353C	HLA-A0201	CLSDHAVFV	10.3	0.125	0.14922	0.5679	strong binding
SMAD4_H290R	HLA-A0201	CLSDHAVFV	10.3	0.125	0.14922	0.5679	strong binding
SMAD4_G386R	HLA-A0201	CLSDHAVFV	10.3	0.125	0.14922	0.5679	strong binding
SMAD4_Y353C	HLA-A0301	KIYPSAYIK	11.1	0.025	0.10207	1.6421	strong binding
SMAD4_H290R	HLA-A0301	KIYPSAYIK	11.1	0.025	0.10207	1.6421	strong binding
SMAD4_G386R	HLA-A0301	KIYPSAYIK	11.1	0.025	0.10207	1.6421	strong binding
TP53_R248Q	HLA-B4001	LEDSSGNLL	13.5	0.06	0.10207	1.6421	strong binding
KRAS_G12D	HLA-B1501	LARSYGIPF	14.5	0.1	0.10207	1.6421	strong binding
KRAS_G12S	HLA-B1501	LARSYGIPF	14.5	0.1	0.10207	1.6421	strong binding
KRAS_Q61H	HLA-B1501	LARSYGIPF	14.5	0.1	0.10207	1.6421	strong binding
TP53_R248Q	HLA-B0702	APAAPTPAA	15.7	0.07	0.28316	0.5679	strong binding
SMAD4_Y353C	HLA-A0201	LLDEVLHTM	17.8	0.25	0.10207	1.6421	strong binding
SMAD4_H290R	HLA-A0201	LLDEVLHTM	17.8	0.25	0.10207	1.6421	strong binding
SMAD4_G386R	HLA-A0201	LLDEVLHTM	17.8	0.25	0.10207	1.6421	strong binding
TP53_R248Q	HLA-B5801	KTYQGSYGF	20.7	0.125	0.10207	1.6421	strong binding
SMAD4_Y353C	HLA-B0702	APAISLSAA	23.7	0.125	0.28316	0.5679	strong binding
SMAD4_H290R	HLA-B0702	APAISLSAA	23.7	0.125	0.28316	0.5679	strong binding
SMAD4_G386R	HLA-B0702	APAISLSAA	23.7	0.125	0.28316	0.5679	strong binding
SMAD4_Y353C	HLA-B1501	LQSNAPSSM	23.9	0.25	0.10207	1.6421	strong binding
SMAD4_H290R	HLA-B1501	LQSNAPSSM	23.9	0.25	0.10207	1.6421	strong binding
SMAD4_G386R	HLA-B1501	LQSNAPSSM	23.9	0.25	0.10207	1.6421	strong binding
TP53_R248Q	HLA-A0201	LLGRNSFEV	24.2	0.4	0.10207	1.6421	strong binding
KRAS_G12D	HLA-B5801	KSALTIQLI	27.1	0.15	0.10207	1.6421	strong binding
KRAS_G12S	HLA-B5801	KSALTIQLI	27.1	0.15	0.10207	1.6421	strong binding
KRAS_Q61H	HLA-B5801	KSALTIQLI	27.1	0.15	0.10207	1.6421	strong binding
SMAD4_Y353C	HLA-B4001	KETPCWIEI	28.5	0.15	0.10207	0.8311	strong binding
SMAD4_H290R	HLA-B4001	KETPCWIEI	28.5	0.15	0.10207	0.8311	strong binding
SMAD4_G386R	HLA-B4001	KETPCWIEI	28.5	0.15	0.10207	0.8311	strong binding
GNAS_R201C	HLA-B3901	NQFRVDYIL	31.7	0.08	0.0993	1.6421	strong binding
TP53_R248Q	HLA-B1501	LQIRGRERF	33.9	0.4	0.10207	1.6421	strong binding
SMAD4_Y353C	HLA-B0702	LPHHQNGHL	36.3	0.175	0.10207	1.6421	strong binding
SMAD4_H290R	HLA-B0702	LPHHQNGHL	36.3	0.175	0.10207	1.6421	strong binding
SMAD4_G386R	HLA-B0702	LPHHQNGHL	36.3	0.175	0.10207	1.6421	strong binding
SMAD4_Y353C	HLA-B1501	LQVAGRKGF	37.5	0.4	0.10207	1.6421	strong binding
SMAD4_H290R	HLA-B1501	LQVAGRKGF	37.5	0.4	0.10207	1.6421	strong binding
SMAD4_G386R	HLA-B1501	LQVAGRKGF	37.5	0.4	0.10207	1.6421	strong binding
SMAD4_Y353C	HLA-A0301	CILRMSFVK	38.5	0.175	0.14922	0.5679	strong binding
SMAD4_H290R	HLA-A0301	CILRMSFVK	38.5	0.175	0.14922	0.5679	strong binding
SMAD4_G386R	HLA-A0301	CILRMSFVK	38.5	0.175	0.14922	0.5679	strong binding
KRAS_G12D	HLA-A0201	CLLDILDTA	41	0.6	0.14922	0.5679	strong binding
KRAS_G12S	HLA-A0201	CLLDILDTA	41	0.6	0.14922	0.5679	strong binding
KRAS_Q61H	HLA-A0201	CLLDILDTA	41	0.6	0.14922	0.5679	strong binding
SMAD4_Y353C	HLA-B2705	LRRLCILRM	43.7	0.175	0.0993	1.6421	strong binding
SMAD4_H290R	HLA-B2705	LRRLCILRM	43.7	0.175	0.0993	1.6421	strong binding
SMAD4_G386R	HLA-B2705	LRRLCILRM	43.7	0.175	0.0993	1.6421	strong binding
GNAS_R201C	HLA-A0201	LIDCAQYFL	47.5	0.6	0.10207	1.6421	strong binding
SMAD4_Y353C	HLA-B0702	MPIADPQPL	50.7	0.25	0.0993	1.6421	normal binding
SMAD4_H290R	HLA-B0702	MPIADPQPL	50.7	0.25	0.0993	1.6421	normal binding
SMAD4_G386R	HLA-B0702	MPIADPQPL	50.7	0.25	0.0993	1.6421	normal binding
SMAD4_Y353C	HLA-B5801	ISNHPAPEY	53.6	0.25	0.10207	0.8311	normal binding
SMAD4_H290R	HLA-B5801	ISNHPAPEY	53.6	0.25	0.10207	0.8311	normal binding
SMAD4_G386R	HLA-B5801	ISNHPAPEY	53.6	0.25	0.10207	0.8311	normal binding
SMAD4_Y353C	HLA-A2402	IYPSAYIKV	58.1	0.125	0.10207	0.8311	normal binding
SMAD4_H290R	HLA-A2402	IYPSAYIKV	58.1	0.125	0.10207	0.8311	normal binding
SMAD4_G386R	HLA-A2402	IYPSAYIKV	58.1	0.125	0.10207	0.8311	normal binding
KRAS_G12D	HLA-B0801	CVKIKKCII	74.5	0.2	0.14922	0.5679	normal binding
KRAS_G12S	HLA-B0801	CVKIKKCII	74.5	0.2	0.14922	0.5679	normal binding
KRAS_Q61H	HLA-B0801	CVKIKKCII	74.5	0.2	0.14922	0.5679	normal binding
SMAD4_Y353C	HLA-A0201	AVFVQSYYL	77.5	0.9	0.14922	0.5679	normal binding
SMAD4_H290R	HLA-A0201	AVFVQSYYL	77.5	0.9	0.14922	0.5679	normal binding
SMAD4_G386R	HLA-A0201	AVFVQSYYL	77.5	0.9	0.14922	0.5679	normal binding
CDKN2A_M9T	HLA-B2705	ARVAELLLL	82.6	0.4	0.14922	0.5679	normal binding
CDKN2A_P11L	HLA-B2705	ARVAELLLL	82.6	0.4	0.14922	0.5679	normal binding
KRAS_G12D	HLA-B1501	KSFEDIHHY	83.1	0.7	0.10207	1.6421	normal binding
KRAS_G12S	HLA-B1501	KSFEDIHHY	83.1	0.7	0.10207	1.6421	normal binding
KRAS_Q61H	HLA-B1501	KSFEDIHHY	83.1	0.7	0.10207	1.6421	normal binding
GNAS_R201C	HLA-B1501	QLIDCAQYF	91.2	0.8	0.0993	1.6421	normal binding
TP53_R248Q	HLA-A0201	KLLPENNVL	91.9	1	0.10207	1.6421	normal binding
GNAS_R201C	HLA-B3901	MHLRQYELL	93.2	0.175	0.0993	1.6421	normal binding
SMAD4_Y353C	HLA-A2402	KYCQYAFDL	95.3	0.175	0.10207	1.6421	normal binding
SMAD4_H290R	HLA-A2402	KYCQYAFDL	95.3	0.175	0.10207	1.6421	normal binding
SMAD4_G386R	HLA-A2402	KYCQYAFDL	95.3	0.175	0.10207	1.6421	normal binding
KRAS_G12D	HLA-A2402	QYMRTGEGF	95.9	0.175	0.0993	0.6019	normal binding
KRAS_G12S	HLA-A2402	QYMRTGEGF	95.9	0.175	0.0993	0.6019	normal binding
KRAS_Q61H	HLA-A2402	QYMRTGEGF	95.9	0.175	0.0993	0.6019	normal binding
KRAS_G12D	HLA-A2601	FAINNTKSF	99.4	0.125	0.14922	0.4651	normal binding
KRAS_G12S	HLA-A2601	FAINNTKSF	99.4	0.125	0.14922	0.4651	normal binding
KRAS_Q61H	HLA-A2601	FAINNTKSF	99.4	0.125	0.14922	0.4651	normal binding
SMAD4_Y353C	HLA-B2705	ARLHIGKGV	99.9	0.4	0.14922	0.5679	normal binding
SMAD4_H290R	HLA-B2705	ARLHIGKGV	99.9	0.4	0.14922	0.5679	normal binding
SMAD4_Y353C	HLA-B5801	ISLSAAAGI	102.4	0.4	0.10207	0.8311	normal binding
SMAD4_H290R	HLA-B5801	ISLSAAAGI	102.4	0.4	0.10207	0.8311	normal binding
SMAD4_G386R	HLA-B5801	ISLSAAAGI	102.4	0.4	0.10207	0.8311	normal binding
KRAS_G12D	HLA-B0702	LARSYGIPF	103.2	0.5	0.10207	1.6421	normal binding
KRAS_G12S	HLA-B0702	LARSYGIPF	103.2	0.5	0.10207	1.6421	normal binding
KRAS_Q61H	HLA-B0702	LARSYGIPF	103.2	0.5	0.10207	1.6421	normal binding
TP53_R248Q	HLA-B1501	KTYQGSYGF	103.6	0.8	0.10207	1.6421	normal binding
TP53_R248Q	HLA-A0201	CQLAKTCPV	112.5	1.1	0.14922	0.5679	normal binding
TP53_R248Q	HLA-A0201	KMFCQLAKT	113.7	1.1	0.10207	1.6421	normal binding
